# Supplementary material for: Biocompatible Polymer-Grafted TiO2 Nanoparticle Sonosensitizers Prepared Using Phosphonic Acid-Functionalized RAFT Agent
Source: MDPI journal article supplement (doi:10.3390/polym15112426), 2023-05-23
Supplement: s1 [file s1]

# Supplementary Materials: Biocompatible Polymer-Grafted TiO<sub>2</sub> Nanoparticle Sonosensitizers Prepared Using Phosphonic Acid-Functionalized RAFT Agent

Yukiya Kitayama <sup>1,2</sup>, Aoi Katayama <sup>2</sup>, Zhicheng Shao <sup>1</sup> and Atsushi Harada <sup>1,2,\*</sup>

<sup>1</sup> Department of Applied Chemistry, Graduate School of Engineering, Osaka Prefecture University, 1-1 Gakuen-cho, Naka-ku, Sakai, Osaka 599-8531, Japan; kitayama@omu.ac.jp (Y.K.); shao.zhicheng.36a@st.kyoto-u.ac.jp (Z.S.)

<sup>2</sup> Department of Applied Chemistry, Graduate School of Engineering, Osaka Metropolitan University, 1-1 Gakuen-cho, Naka-ku, Sakai, Osaka 599-8531, Japan; sc22139u@st.omu.ac.jp

\* Correspondence: atsushi\_harada@omu.ac.jp

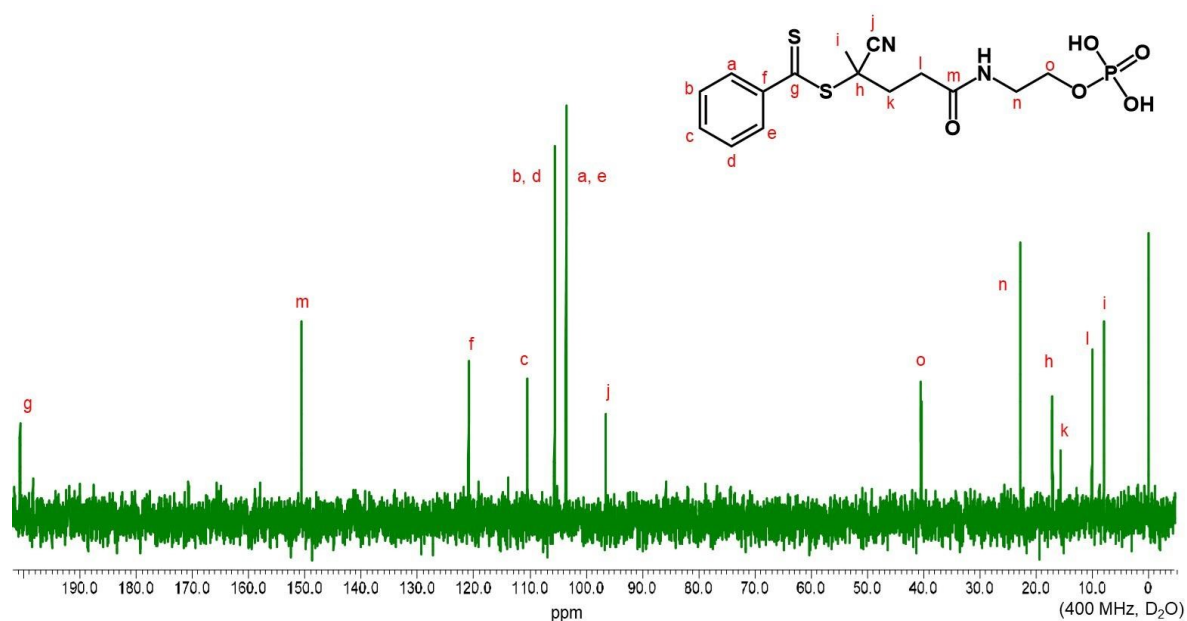

**Figure S1.** <sup>13</sup>C NMR spectrum of RAFT-PO<sub>4</sub>H<sub>2</sub> in D<sub>2</sub>O.

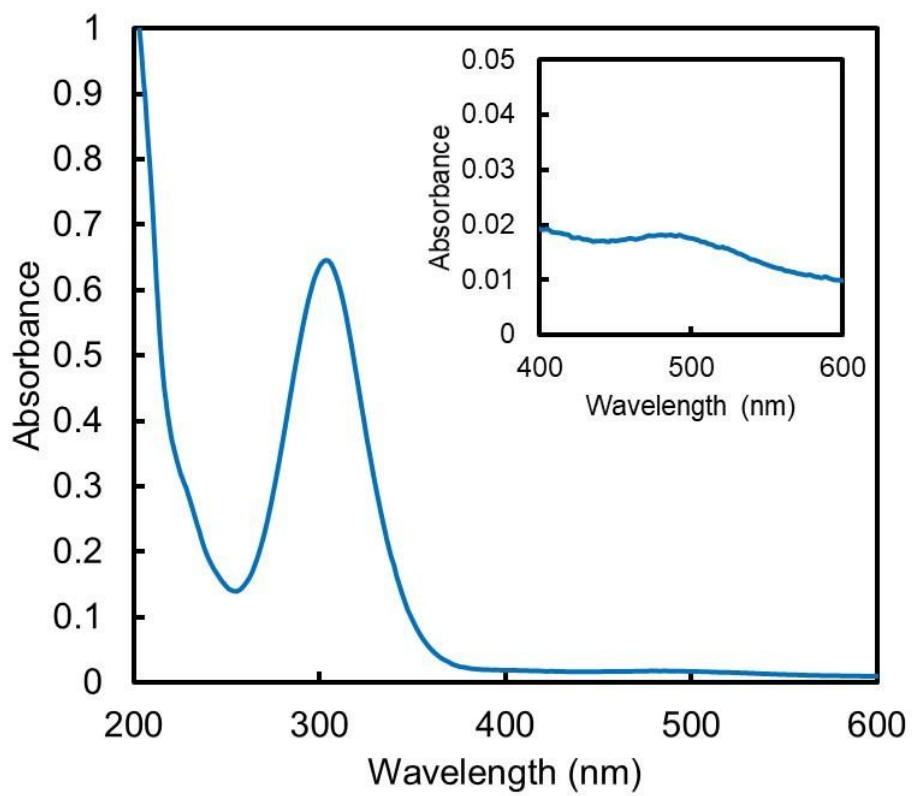

**Figure S2.** UV-Vis spectrum of RAFT-PO<sub>4</sub>H<sub>2</sub>.

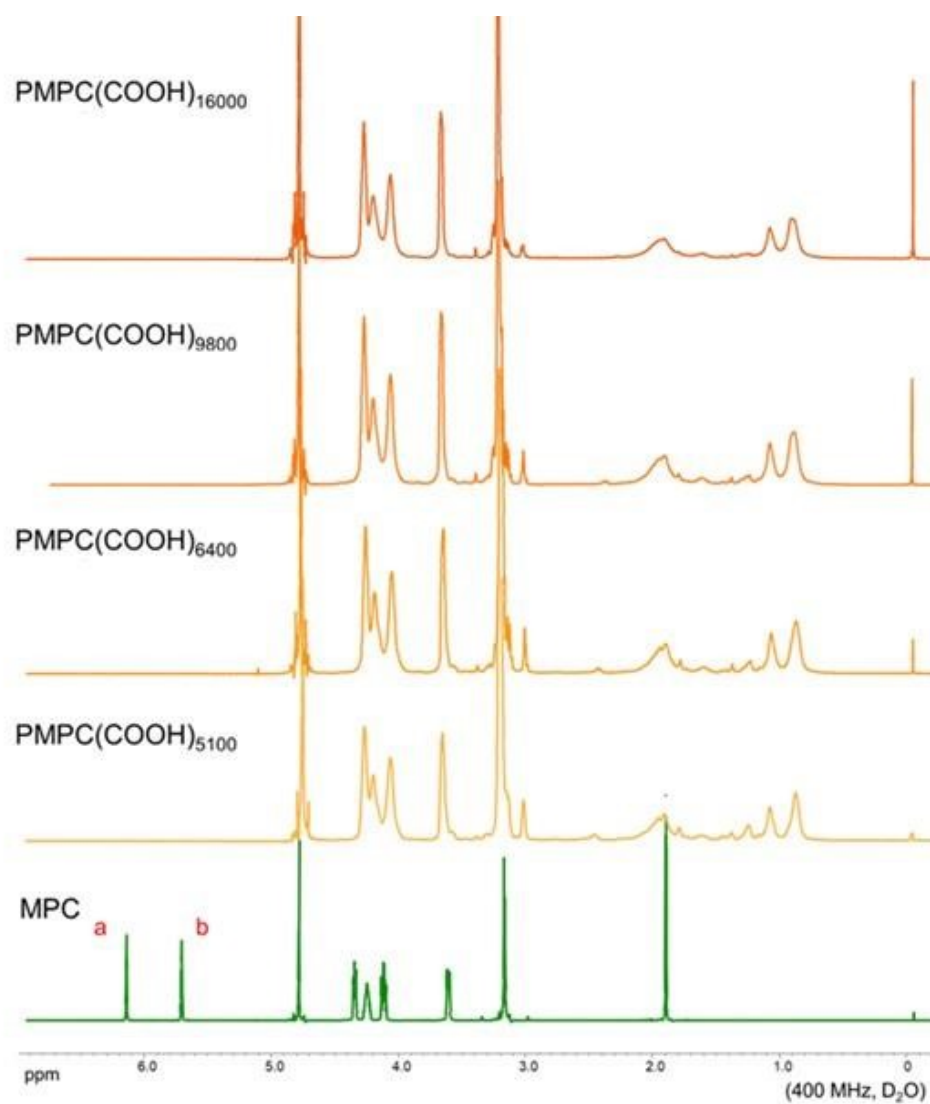

**Figure S3.**  $^1\text{H}$  NMR spectra of MPC and polymer solutions obtained after RAFT polymerizations of MPC using RAFT-COOH with different molar ratio of MPC and RAFT- $\text{PO}_4\text{H}_2$ .

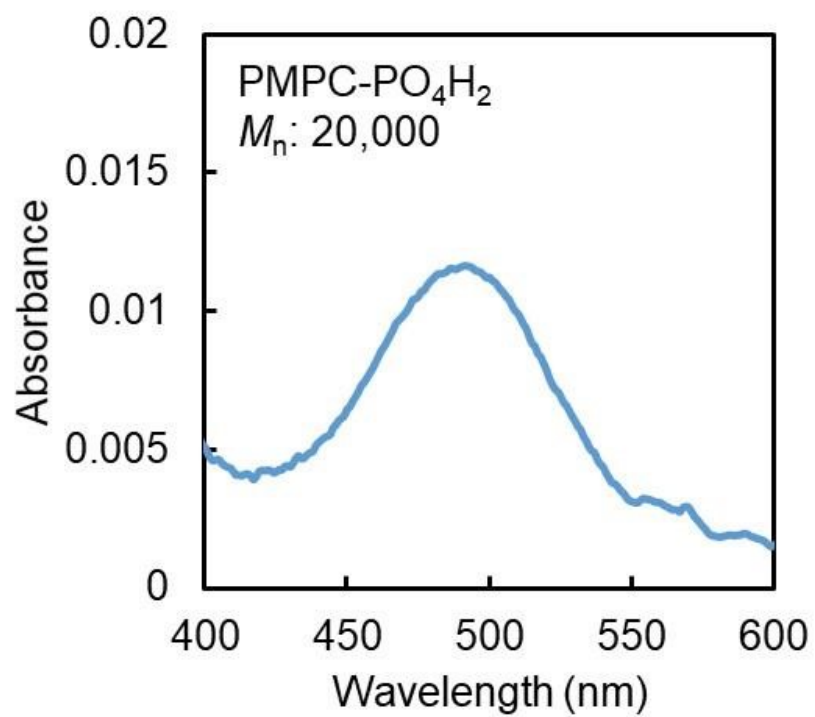

**Figure S4.** UV-Vis spectra of PMPC-PO<sub>4</sub>H<sub>2</sub> prepared with RAFT- PO<sub>4</sub>H<sub>2</sub>. Polymer concentration: 10 mg/mL. Solvent: Water dissolving Brij98 (0.5 mM)

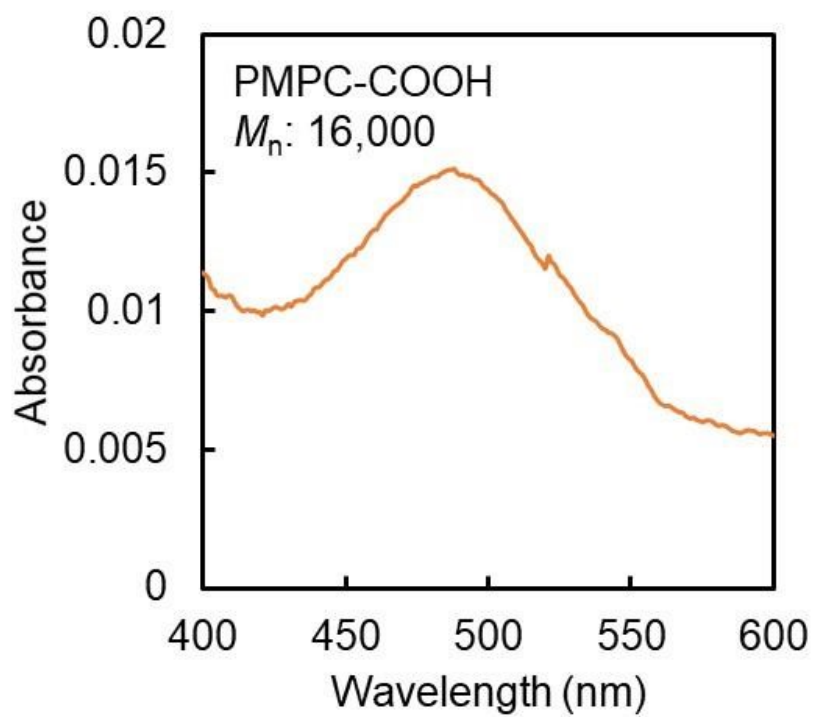

**Figure S5.** UV-Vis spectra of PMPC-COOH prepared with RAFT-COOH. Polymer concentration: 10 mg/mL. Solvent: Water dissolving Brij98 (0.5 mM).

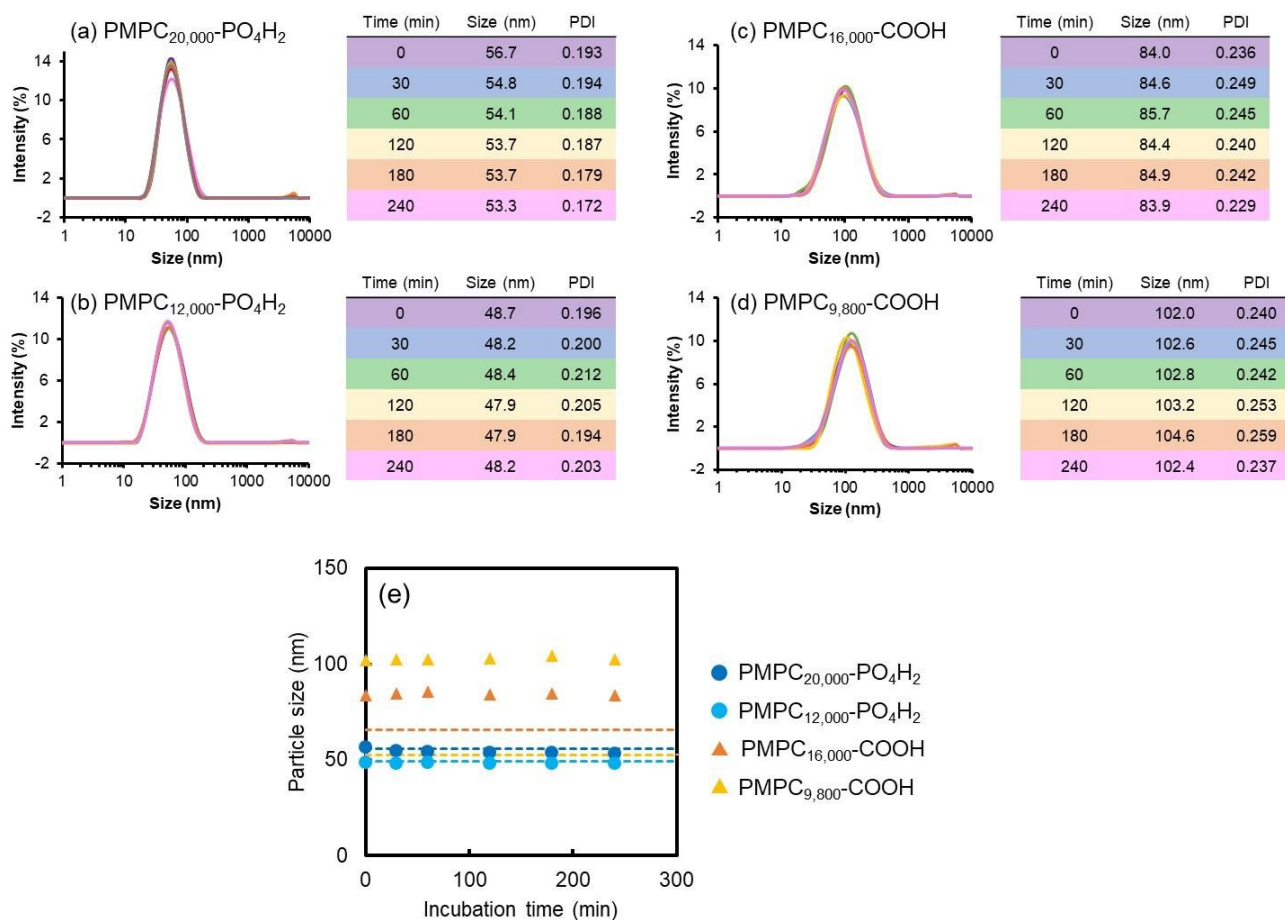

**Figure S6.** Particle size distributions, average particle size and PDI values of PMPC-modified TiO<sub>2</sub> nanoparticles prepared with PMPC<sub>20000</sub>-PO<sub>4</sub>H<sub>2</sub> (a), PMPC<sub>12000</sub>-PO<sub>4</sub>H<sub>2</sub> (b), PMPC<sub>12,000</sub>-COOH (c), and PMPC<sub>9,800</sub>-COOH (d) at different incubation times (0 min: purple, 30 min: blue, 60 min: green, 120 min: yellow, 180 min: orange, 240 min: pink) in pure water. Particle size v.s. incubation time plots of PMPCmodified TiO<sub>2</sub> nanoparticles prepared with PMPC<sub>20000</sub>-PO<sub>4</sub>H<sub>2</sub>, PMPC<sub>12000</sub>-PO<sub>4</sub>H<sub>2</sub>, PMPC<sub>12,000</sub>-COOH, and PMPC<sub>9,800</sub>-COOH after 100 times dilution with pure water (e). Dashed lines in (e) are particle size before dilution.

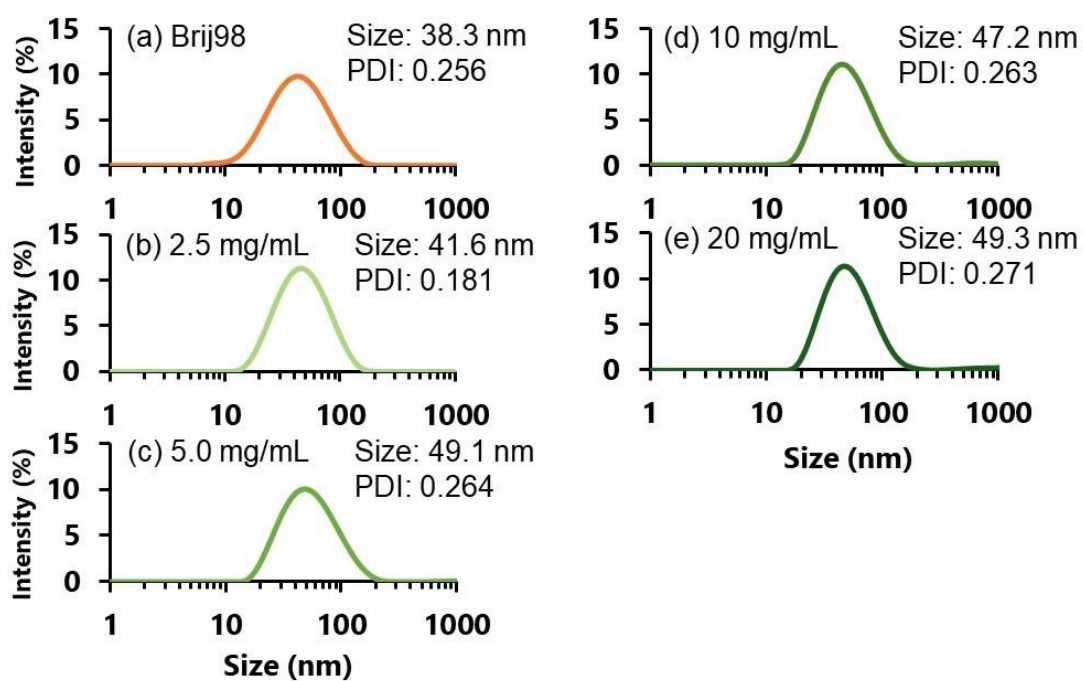

**Figure S7.** Particle size distributions of Brij98-stabilized (a) and PMPC-modified  $\text{TiO}_2$  nanoparticles prepared with different concentrations of  $\text{PMPC}_{7600}\text{-PO}_4\text{H}_2$  (b: 2.5, c: 5.0, d: 10, e: 20 mg/mL).
